# Supplementary material for: Mo-doped FeP nanoparticles encapsulated in a N, P doped carbon matrix with an optimized d-band center for a highly efficient and stable hydrogen evolution reaction
Source: Royal Society of Chemistry journal article supplement (doi:10.1039/d4nj01410c), 2024-01-01
Supplement: d4nj01410c1.pdf [file d4nj01410c1.pdf]

## Supporting Information

### **Mo-doped FeP nanoparticles encapsulated in N, P doped carbon matrix with optimized d-band center for highly efficient and stable hydrogen evolution reaction**

**Ting Zhang<sup>1</sup>, Jianguo Zhong<sup>1</sup>, Yu Ding<sup>1</sup>, Wei Gao<sup>2</sup>, Yuxin Wang<sup>1\*</sup>**

<sup>1</sup> School of Materials Science and Engineering, Jiangsu University of Science and Technology, Zhenjiang 212114, P. R. China

<sup>2</sup> Department of Chemical and Materials Engineering, Faculty of Engineering, The University of Auckland, Auckland 1142, New Zealand

\* Corresponding authors

E-mail address: [ywan943@163.com](mailto:ywan943@163.com) ([Yuxin Wang](#))

## **2. Materials and Methods**

### **2.1. Sample preparation**

#### **2.1.1 Synthesis of Mo-FeP nanoparticles encapsulated in N, P doped carbon matrix**

FeOOH particles are synthesized by the hydrolysis process of FeCl<sub>3</sub> as reported in the previous research <sup>1</sup>. To be specific, 2 mmol FeCl<sub>3</sub> was melted in 30 mL DI water, after stirring for 30 mins, the prepared solution was transferred to the 100 mL autoclave and heated under 150 °C for 3 h. After cooled to the room temperature, 3 mmol Na<sub>2</sub>MoO<sub>4</sub> was dissolved in the prepared solution and after stirring for 60 min, 10 mmol 2-methylimidazole dissolved in the solution followed with 30 min stirring. After centrifugation the prepared precursor was washed by DI water and ethanol for several times, then was put in the vacuum oven under 60 °C for 24 h. The obtained powder was annealed in the tube furnace with NaH<sub>2</sub>PO<sub>2</sub> placed in the upstream of the crucible under 400 °C, 450 °C, and 500 °C for 2 h in an Ar atmosphere, separately.

#### **2.1.2 Synthesis of FeP nanoparticles encapsulated in N, P doped carbon matrix**

FeOOH particles are synthesized by the hydrolysis process of FeCl<sub>3</sub> as reported in the previous research <sup>1</sup>. To be specific, 2 mmol FeCl<sub>3</sub> was melted in 30 mL DI water, after stirring for 30 mins, the prepared solution was transferred to the 100 mL autoclave and heated under 150 °C for 3 h. After cooled to the room temperature, 10 mmol 2-methylimidazole dissolved in the solution followed with 30 min stirring. After centrifugation the prepared precursor was washed by DI water and ethanol for several times, then was put in the vacuum oven under 60 °C for 24 h. The obtained powder

was annealed in the tube furnace with  $\text{NaH}_2\text{PO}_2$  placed in the upstream of the crucible under  $450\text{ }^\circ\text{C}$  for 2 h in an Ar atmosphere.

### **2.1.3 Synthesis of Mo-Fe<sub>2</sub>O<sub>3</sub> nanoparticles encapsulated in N doped carbon matrix**

FeOOH particles are synthesized by the hydrolysis process of  $\text{FeCl}_3$  as reported in the previous research 1. To be specific, 2 mmol  $\text{FeCl}_3$  was melted in 30 mL DI water, after stirring for 30 mins, the prepared solution was transferred to the 100 mL autoclave and heated under  $150\text{ }^\circ\text{C}$  for 3 h. After cooled to the room temperature, 3 mmol  $\text{Na}_2\text{MoO}$  was dissolved in the prepared solution and after stirring for 60 min, 10 mmol 2-methylimidazole dissolved in the solution followed with 30 min stirring. After centrifugation the prepared precursor was washed by DI water and ethanol for several times, then was put in the vacancy oven under  $60\text{ }^\circ\text{C}$  for 24 h. The obtained powder was annealed in the tube furnace under  $450\text{ }^\circ\text{C}$  for 2 h in an Ar atmosphere, separately.

### **2.1.4 Synthesis of Mo-FeP nanoparticles**

Mo-FeP without the protection of N, P doped carbon matrix was prepared by putting 2 mmol  $\text{FeCl}_3$  and 2 mmol  $\text{NaOH}$  in 30 mL DI water and stirring for 15 min. The prepared solution was transferred to an autoclave and heated in the oven under  $150\text{ }^\circ\text{C}$  for 3 h. After cooling down to room temperature, 3 mmol  $\text{Na}_2\text{MoO}_4$  was added and stirred for 60 mins. The prepared precursor was centrifuged and washed three times by DI water and ethanol, separately. Then it was dried in the vacuum oven under  $60\text{ }^\circ\text{C}$  for 24 h. The obtained powder was annealed in the tube furnace with  $\text{NaH}_2\text{PO}_2$  placed upstream of the crucible under  $450\text{ }^\circ\text{C}$  for 2 h in an Ar atmosphere.

## 2.2. Material Characterization

Powder X-ray diffraction (XRD, Smartlab, 9 kw) spectrum was collected with Cu K $\alpha$  radiation to analyze the crystal structure of the catalyst with a scanning rate of 2°/min between 2 $\theta$  ranging 20°-80°. The microstructure of the catalysts was characterized through SEM (FEI XL30 S-FEG) under a voltage of 20 kV and TEM (FEI Tecnai G2 F20) operating at a voltage of 200 kV. X-ray photoelectron spectroscopy (XPS) was applied to observe the chemical valence states of different catalyst elements.

## 2.3. Electrochemical measurements

The electrochemical properties of the catalyst were analyzed using a three-electrode system with a CHI 650E electrochemical workstation. Mo-FeP@NPC-400, Mo-FeP@NPC, Mo-FeP@NPC-500, FeP@NPC, Fe<sub>2</sub>O<sub>3</sub>-MoC@NPC and Pt sheet were tested in both 0.5 M H<sub>2</sub>SO<sub>4</sub> and 1.0 M KOH electrocatalyst. The working electrode was prepared by adding 5 mg prepared catalyst and 1.5 mg carbon black in 250  $\mu$ L DI water, 250  $\mu$ L ethanol, and 50  $\mu$ L of Nafion 117 solution (5 wt.%). The prepared slurry was ultrasonic treated for 10 min in iced water and then prepared as the working electrode. The Pt sheet was applied as the counter reference, and saturated calomel electrode (SCE) was prepared as the reference electrode.

Potentials tested were iR-compensated from the equation:  $E_{\text{RHE}} = E_{\text{SCE}} + 0.059 \text{ pH} + 0.245 \text{ V}$ . Linear sweep voltammetry (LSV) was tested with the rate of 5 mV s<sup>-1</sup>. The Electrochemical impedance spectroscopy (EIS) was measured at 63 mV (H<sub>2</sub>SO<sub>4</sub>) and 116 mV (KOH) with a frequency range of 100 KHz to 10 MHz. The electrochemical

active surface area was tested through the electrochemical double layer capacitance (Cdl) spectrum through the scan rate from 20 mV s<sup>-1</sup> to 100 mV s<sup>-1</sup>. The stability of the catalyst was analyzed through the chronopotentiometry spectrum under the overpotential of 86 mV and 134 mV in acid and alkaline electrolytes, separately.

#### **2.4. Theoretical calculations**

Perdew-Burke-Ernzerhof (PBE) exchange-correlation function was applied in Density function theory calculation by the module of CASTEP in Materials Studio. The cutoff energy was set up as 381 eV for the valence electrons cell, and the parameters were optimized until the force on each atom was less than 0.05 eV Å<sup>-1</sup>. FeP space group 33 was used in the calculation, with lattice constants of  $a = 5.191 \text{ \AA}$ ,  $b = 3.108 \text{ \AA}$ , and  $c = 5.794 \text{ \AA}$ .

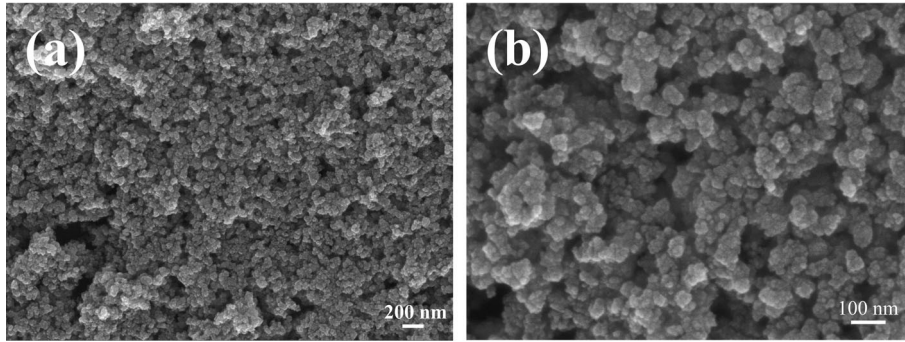

Figure S1 SEM images of Mo-FeP@NPC-400.

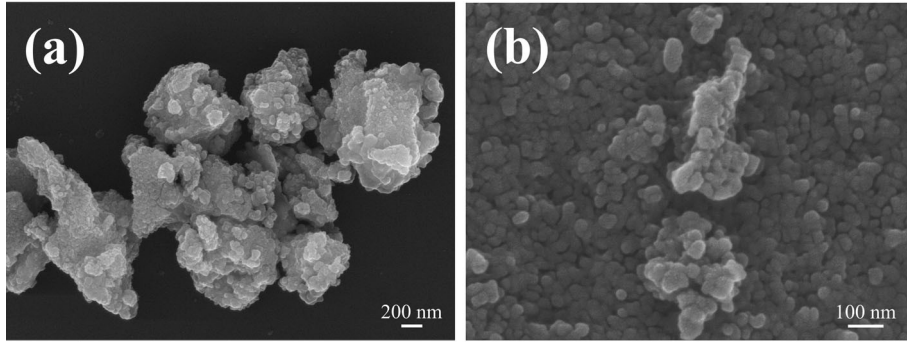

Figure S2 SEM images of Mo-FeP@NPC-450.

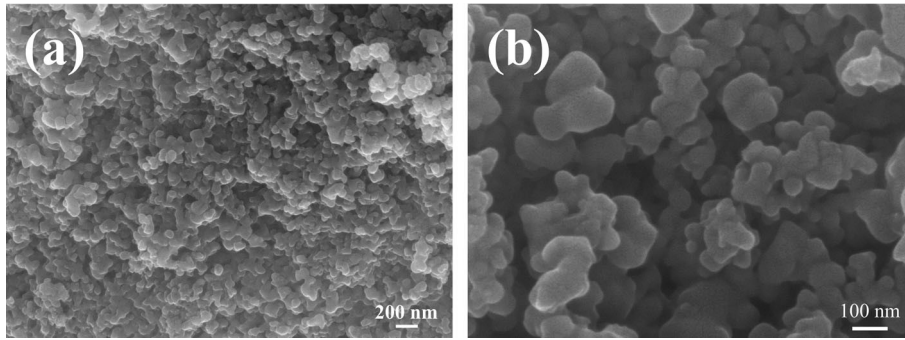

Figure S3 SEM images of Mo-FeP@NPC-500.



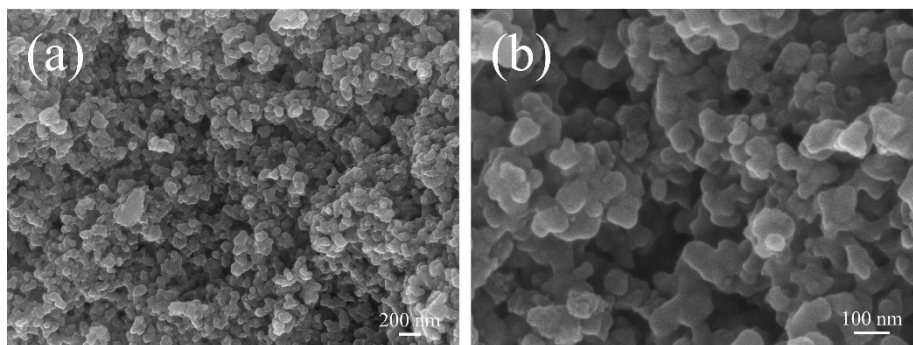

Figure S4 SEM images of FeP@NPC-450.

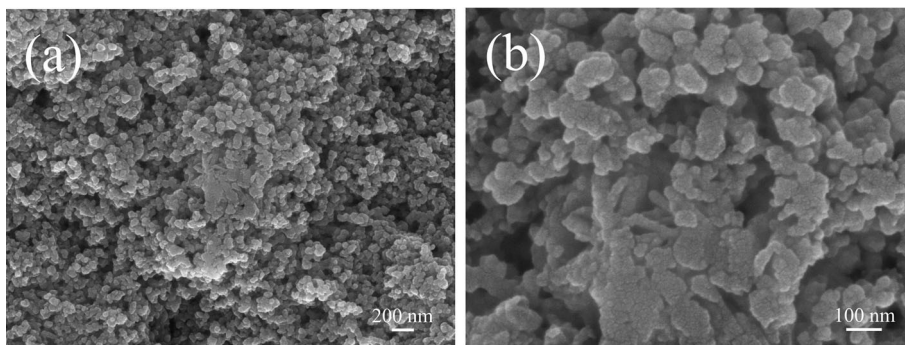

Figure S5 SEM images of Mo-Fe<sub>2</sub>O<sub>3</sub>@NC-450

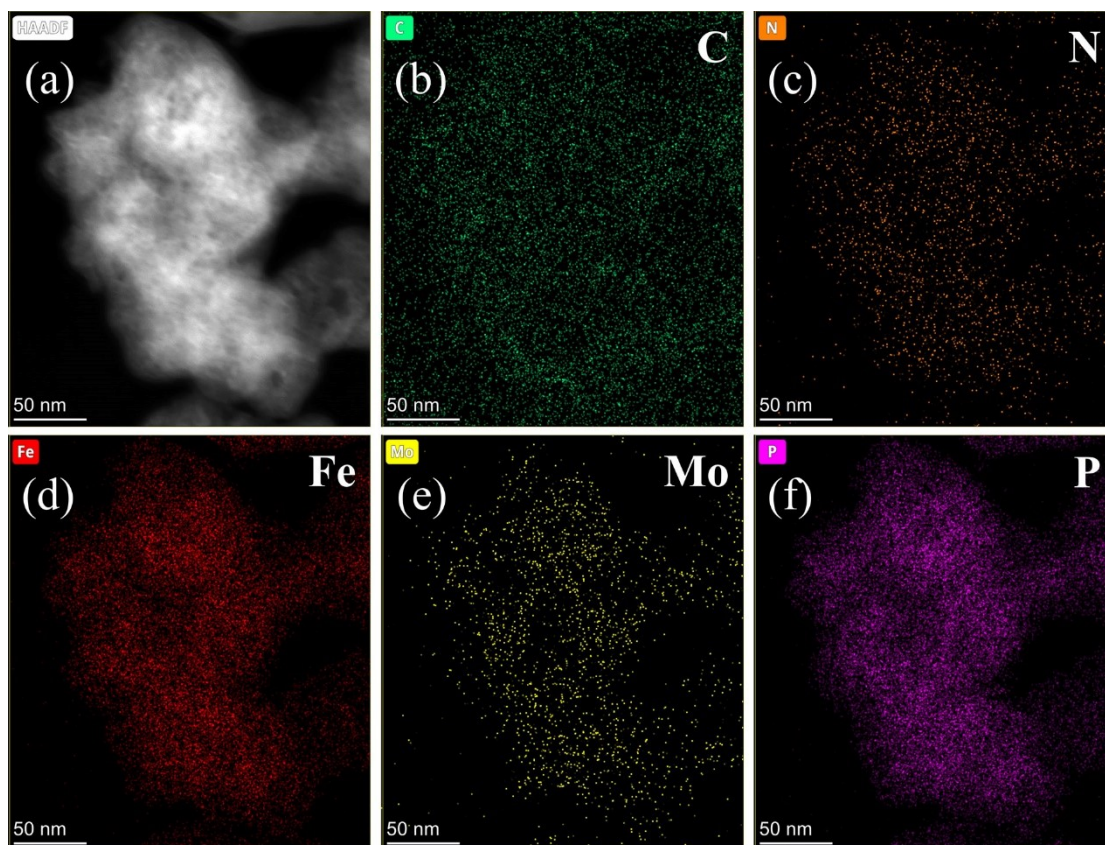

Figure S6 EDS elemental mapping images of Mo-FeP@NPC

Table S1. Comparison of the catalytic performances involving FeP.

| Catalyst                               | Overpotential<br>@10 mA cm <sup>-2</sup><br>[mV] | Tafel slope<br>[mV dec <sup>-1</sup> ] | Stabilization | Electrolyte                                       | Ref          |
|----------------------------------------|--------------------------------------------------|----------------------------------------|---------------|---------------------------------------------------|--------------|
| Co-Doped FeP                           | 126                                              | 63.6                                   | 60 min        | 0.5 M H <sub>2</sub> SO <sub>4</sub>              | <sup>2</sup> |
| Ni-doped FeP/carbon hollow<br>nanorods | 72                                               | 54                                     | 12 h          | 0.5 M H <sub>2</sub> SO <sub>4</sub>              | <sup>3</sup> |
| Sm-Doped FeP                           | 71                                               | 85.9                                   | 40 h          | 1.0 M KOH                                         | <sup>4</sup> |
| V-Doped FeP                            | 149                                              | 40.97                                  | 24 h          | 1.0 M KOH                                         | <sup>5</sup> |
| MoO <sub>2</sub> -FeP                  | 103                                              | 61.92                                  | 24 h          | 1.0 M KOH                                         | <sup>6</sup> |
| Ni-FeP/TiN/CC                          | 75                                               | 96                                     | 10 h          | 1.0 M KOH                                         | <sup>7</sup> |
| N-FeP                                  | 226                                              | 84.8                                   | /             | 1.0 M KOH                                         | <sup>8</sup> |
| 3F-FeP                                 | 191                                              | 56.12                                  | 100 h         | 1.0 M KOH                                         | <sup>9</sup> |
| Mo-FeP@NPC                             | 63/116                                           | 57.9/63.8                              | 40 h          | 0.5 M H <sub>2</sub> SO <sub>4</sub><br>/1.0M KOH | This<br>work |

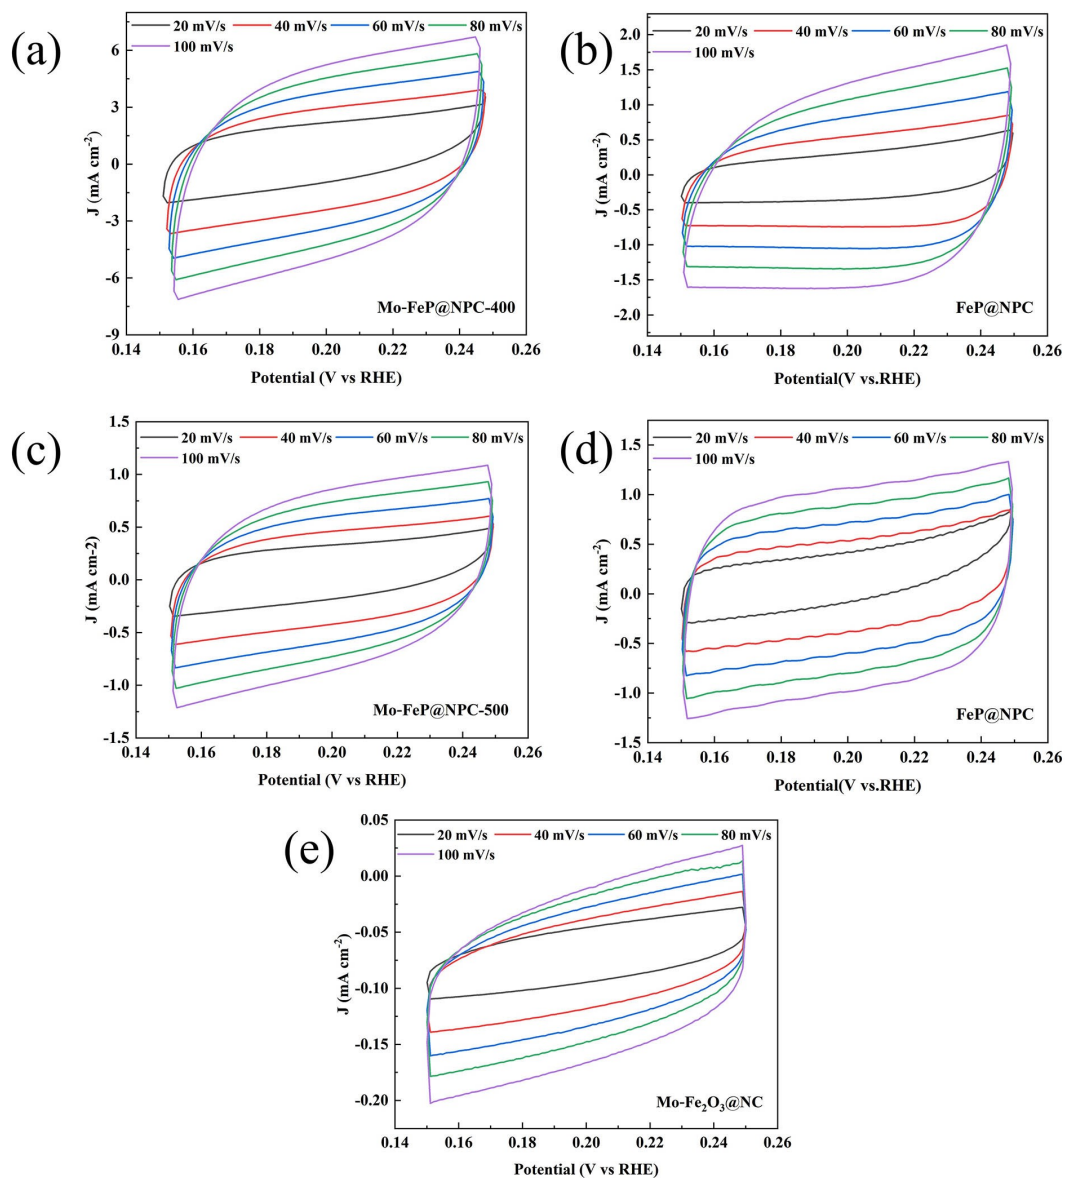

Figure S7 Cyclic voltammograms (CV) in the region of 0.15-0.25 V vs. RHE for (a) Mo-FeP@NPC-400; (b) Mo-FeP@NPC; (c) Mo-FeP@NPC-500; (d) FeP@NPC and (e) Mo-Fe<sub>2</sub>O<sub>3</sub>@NC in 0.5 M H<sub>2</sub>SO<sub>4</sub>.

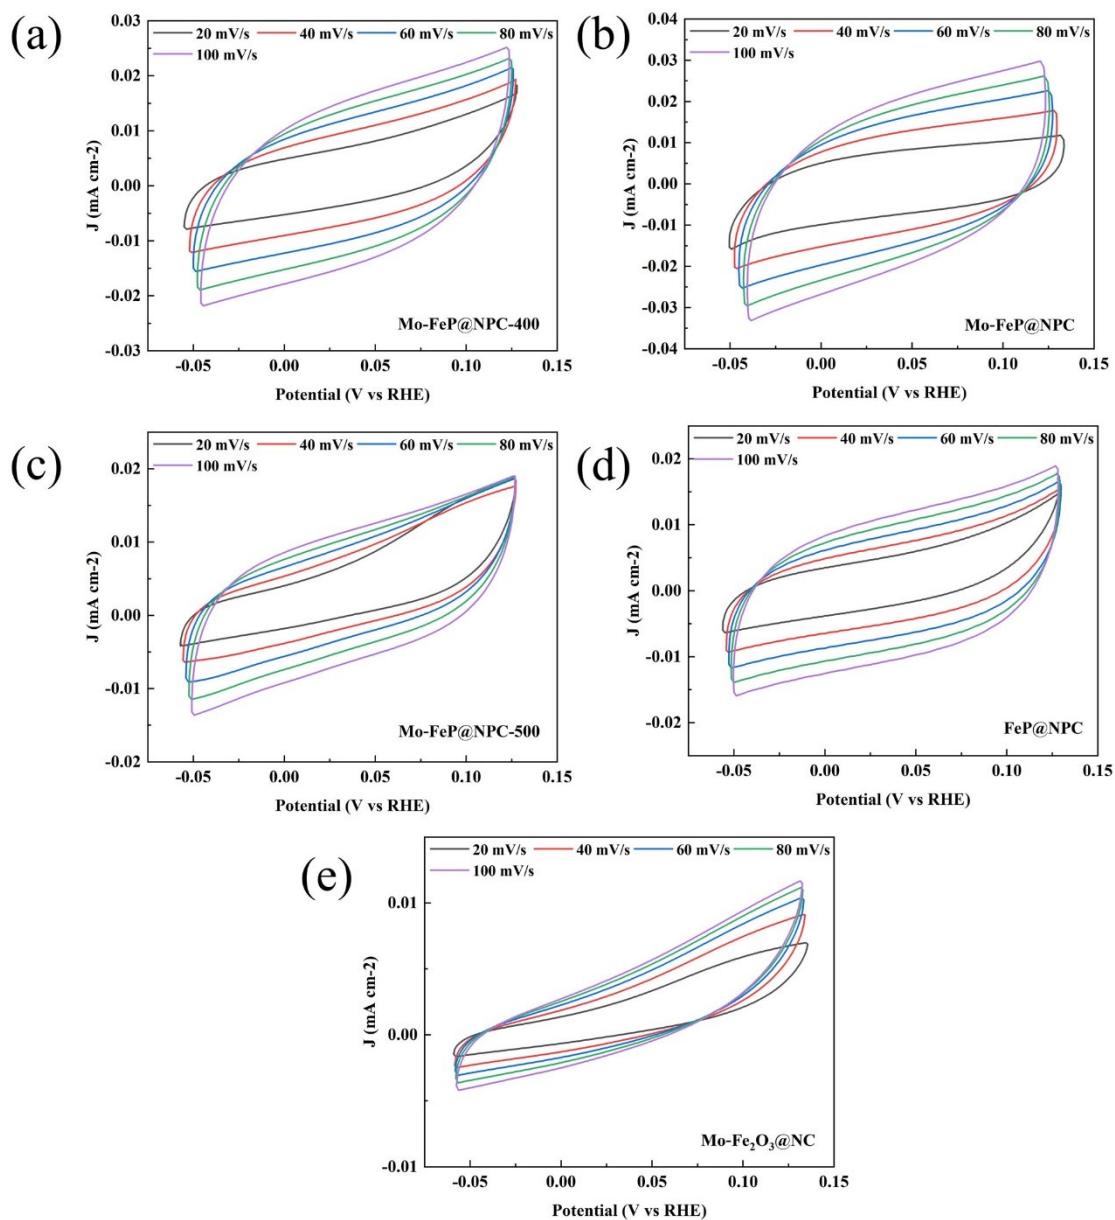

Figure S8 Cyclic voltammograms (CV) in the region of 0.15-0.25 V vs. RHE for (a) Mo-FeP@NPC-400; (b) Mo-FeP@NPC; (c) Mo-FeP@NPC-500; (d) FeP@NPC and (e) Mo-Fe<sub>2</sub>O<sub>3</sub>@NC in 1.0 M KOH.

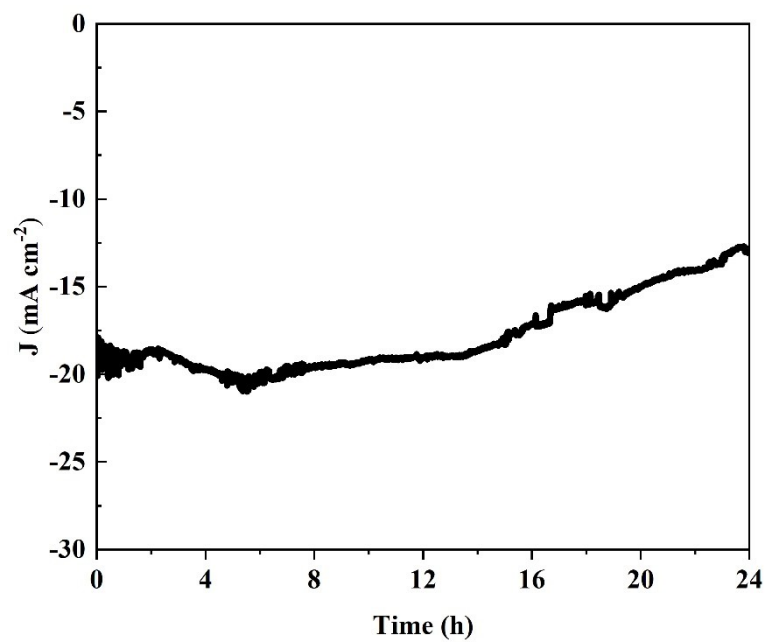

**Figure S9** Chronoamperometry of Mo-FeP@NPC under 86 mV for 24 h in 0.5 M  $\text{H}_2\text{SO}_4$ .

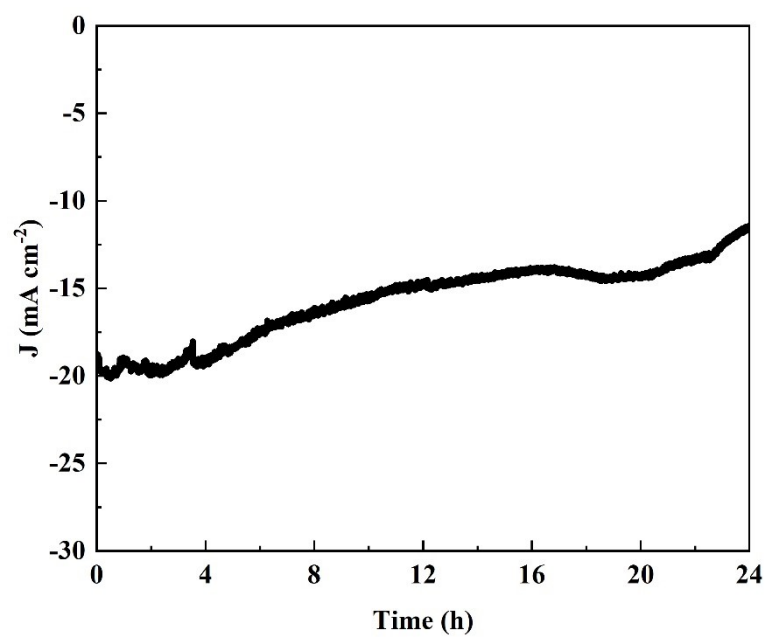

**Figure S10** Chronoamperometry of Mo-FeP@NPC under 134 mV for 24 h in 1.0 M KOH.



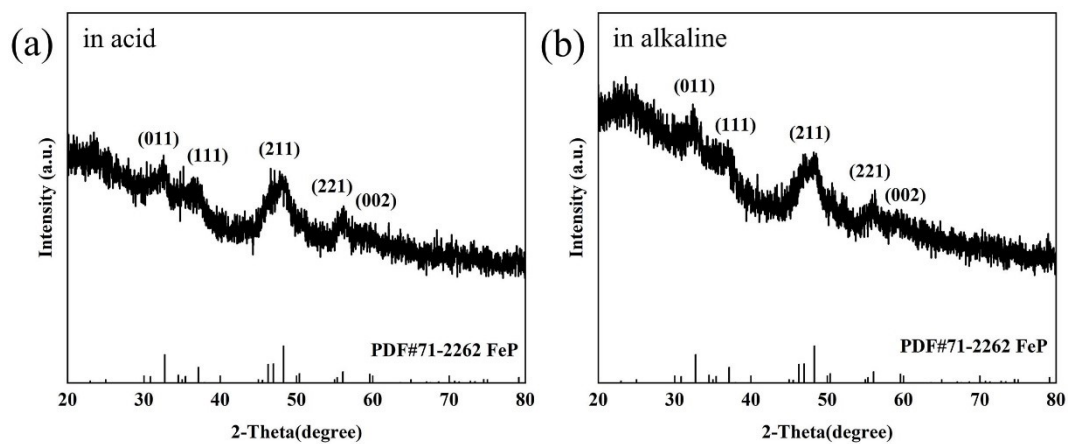

Figure. S11. XRD images of Mo-FeP@NPC after 40 h chronoamperometry test in (a) 0.5 M H<sub>2</sub>SO<sub>4</sub> and (b) 1.0 M KOH.

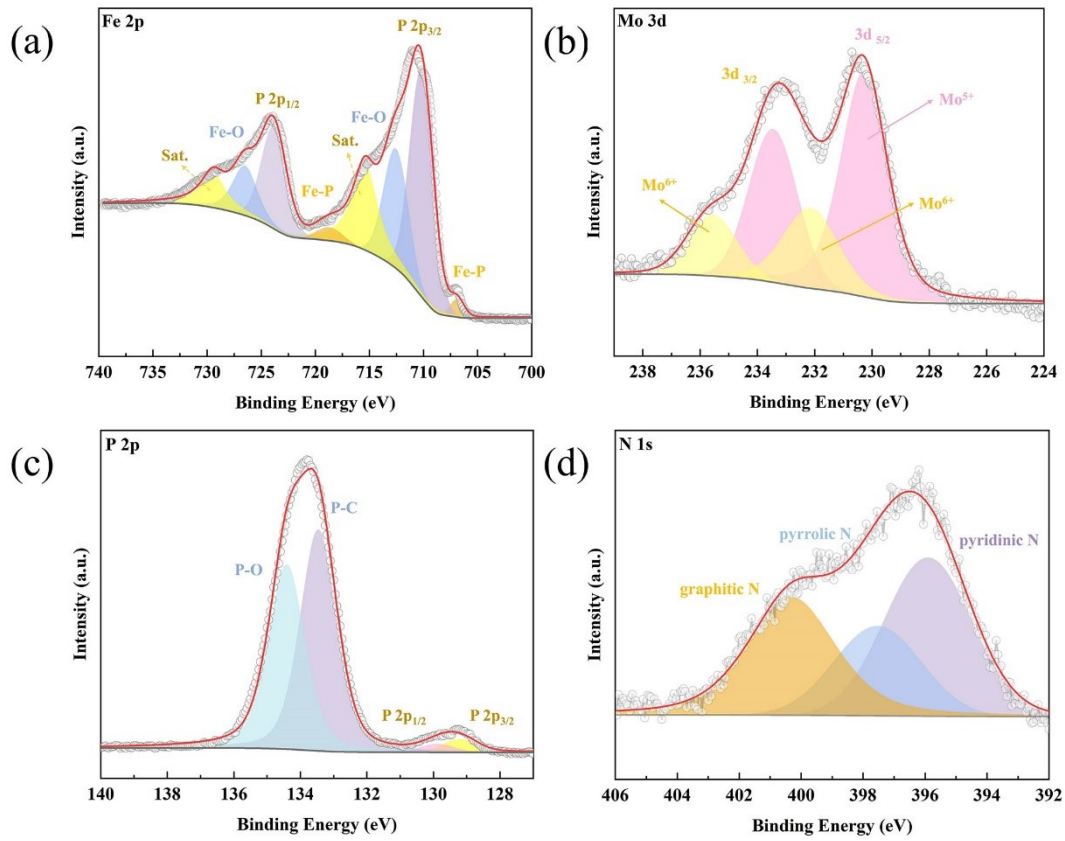

Figure. S12. XPS images of Mo-FeP@NPC after 40 h chronoamperometry test in 0.5 M H<sub>2</sub>SO<sub>4</sub>.

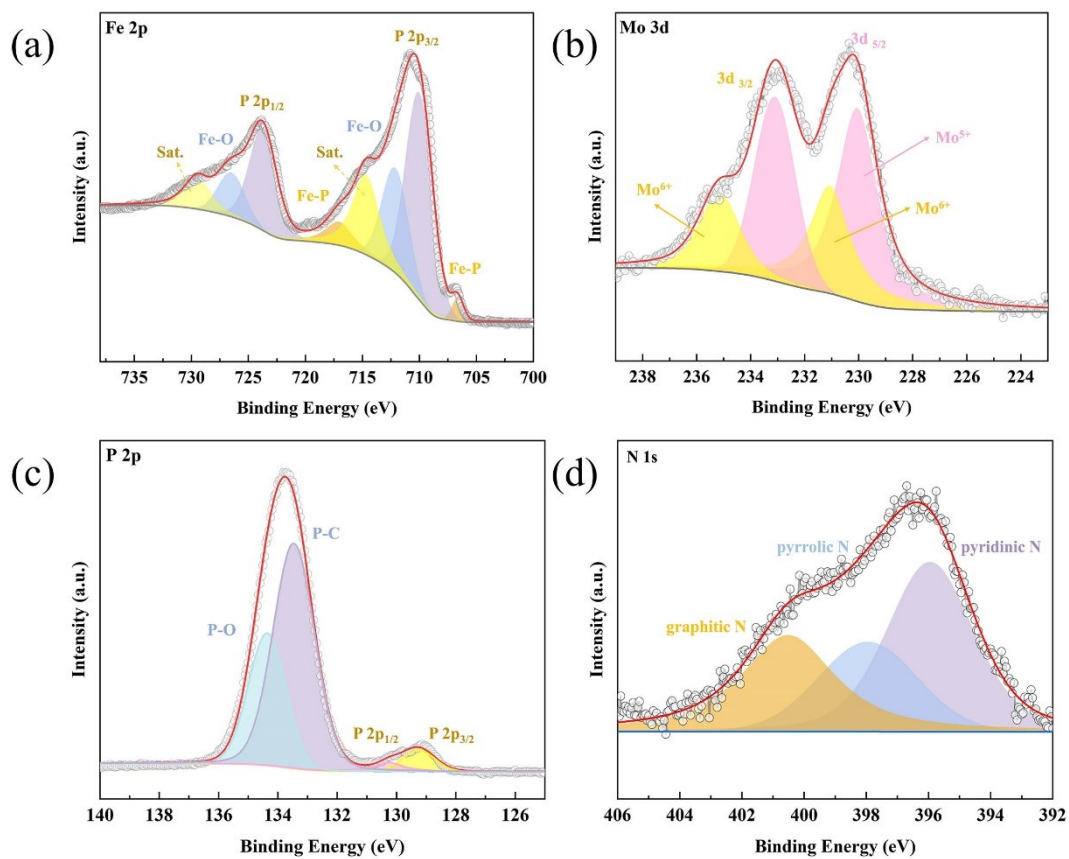

Figure. S13. XPS images of Mo-FeP@NPC after 40 h chronoamperometry test in 1.0 M KOH.

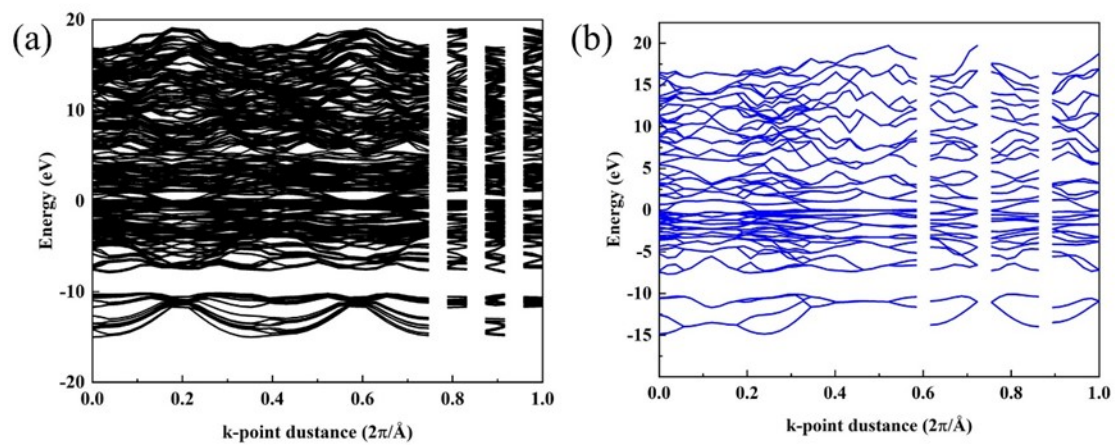

Figure S14 Calculated electronic band structure for configurations of (a) Mo-FeP and (b) FeP.

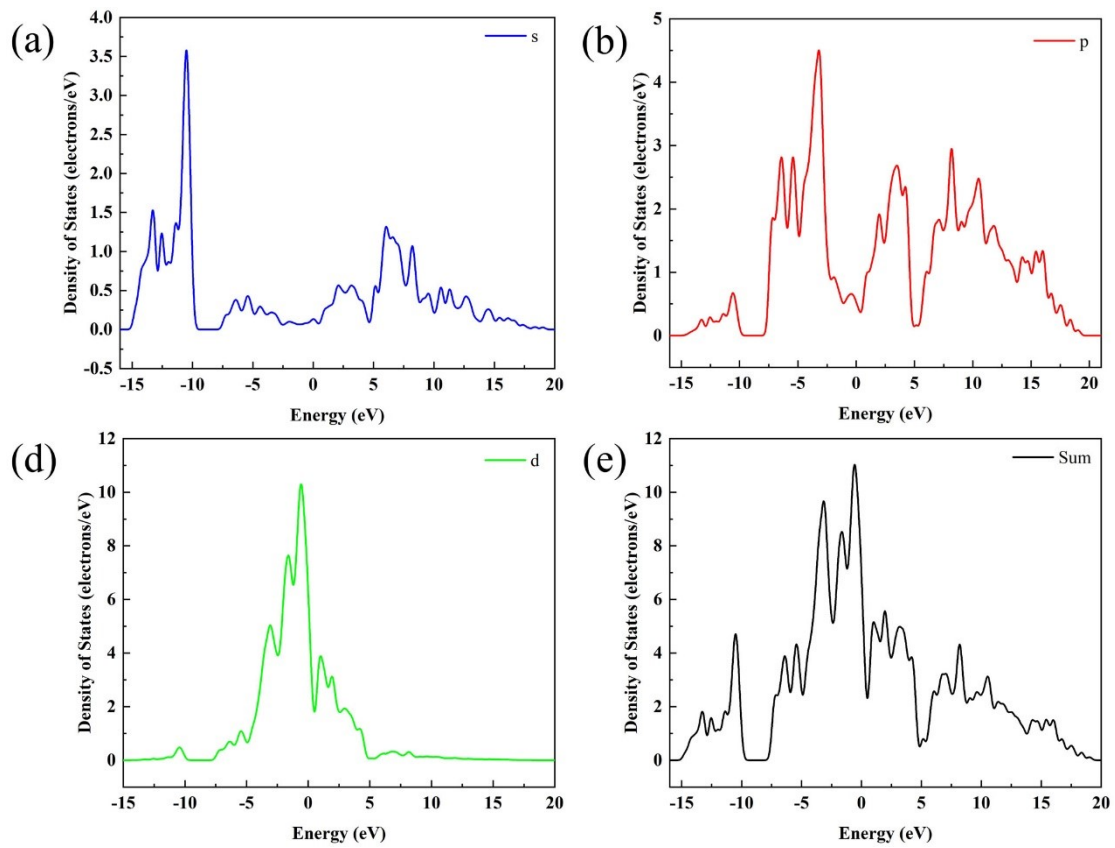

Figure S15 Partial electronic density of state (PDOS) calculated of Mo-FeP for (a) s, (b) p, (c) d, (c) sum.

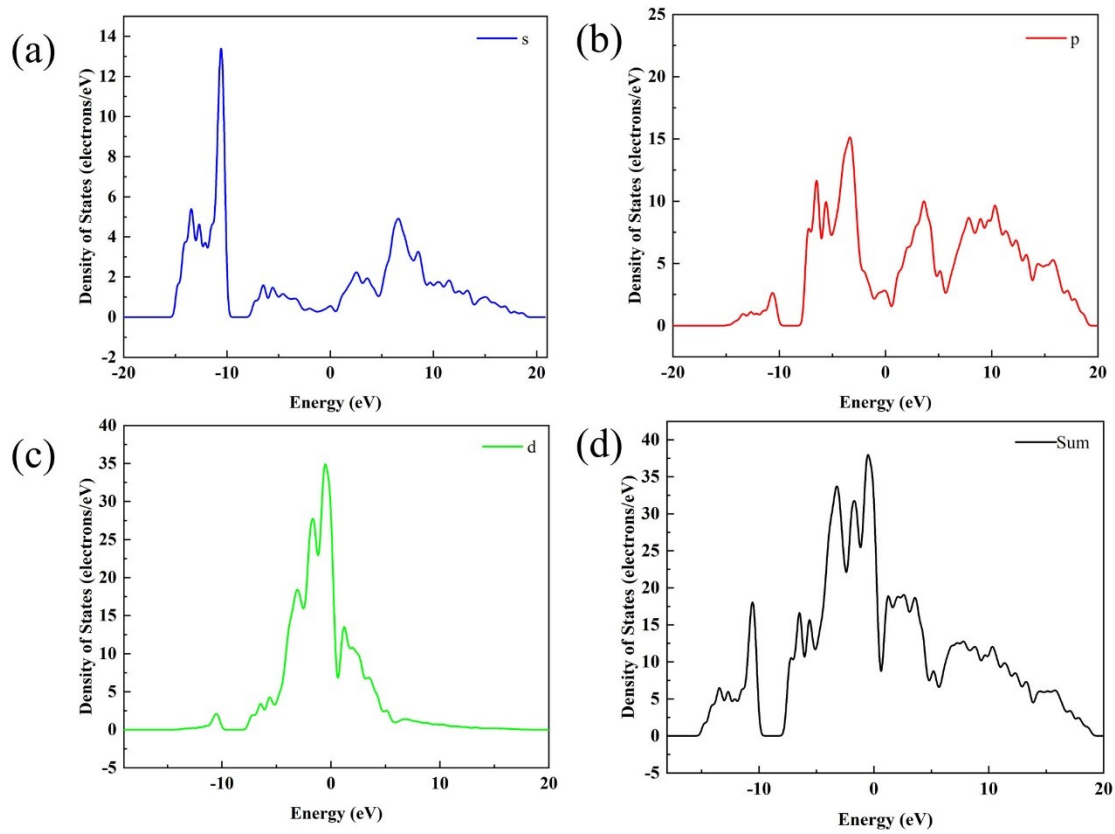

Figure S16 Partial electronic density of state (PDOS) calculated of FeP for (a) s, (b) p, (c) d, (c) sum.

## Reference

1. T. Zhang, T. Yang, B. Li, S. Wei and W. J. A. S. S. Gao, *Appl. Surf. Sci.*, 2022, **597**, 153662.
2. G. Cho, Y. Park, H. Kang, Y.-k. Hong, T. Lee and D.-H. J. A. S. S. Ha, *Appl. Surf. Sci.*, 2020, **510**, 145427.
3. X. F. Lu, L. Yu and X. W. J. S. a. Lou, *Sci. Adv.*, 2019, **5**, eaav6009.
4. M. Chen, Z. Lin, Y. Ren, X. Wang, M. Li, D. Sun, Y. Tang and G. J. M. C. F. Fu, *Mater. Chem. Front.*, 2023, **7**, 4132-4141.
5. X.-Y. Zhang, F.-T. Li, Z.-N. Shi, B. Dong, Y.-W. Dong, Z.-X. Wu, L. Wang, C.-G. Liu, Y.-M. J. J. o. C. Chai and I. Science, *J. Colloid Interface Sci.*, 2022, **615**, 445-455.
6. G. Yang, Y. Jiao, H. Yan, Y. Xie, A. Wu, X. Dong, D. Guo, C. Tian and H. J. A. M. Fu, *Adv. Mater*, 2020, **32**, 2000455.
7. X. Peng, A. M. Qasim, W. Jin, L. Wang, L. Hu, Y. Miao, W. Li, Y. Li, Z. Liu and K. J. N. E. Huo, *Nano Energy* 2018, **53**, 66-73.
8. M. Yang, J.-Y. Xie, Z.-Y. Lin, B. Dong, Y. Chen, X. Ma, M.-L. Wen, Y.-N. Zhou, L. Wang and Y.-M. J. A. S. S. Chai, *Appl. Surf. Sci.*, 2020, **507**, 145096.
9. X.-Y. Zhang, F.-T. Li, J. Zhao, B. Dong, F.-L. Wang, Z.-X. Wu, L. Wang, Y.-M. Chai and C.-G. J. F. Liu, 2022, **316**, 123206.
